# Supplementary material for: Development and validation of pyroptosis-related lncRNAs prediction model for bladder cancer
Source: Oxford University Press journal article supplement (doi:10.1042/bsr20212253), 2022-01-01
Supplement: bsr-2021-2253_supp.pdf [file bsr-2021-2253_supp.pdf]

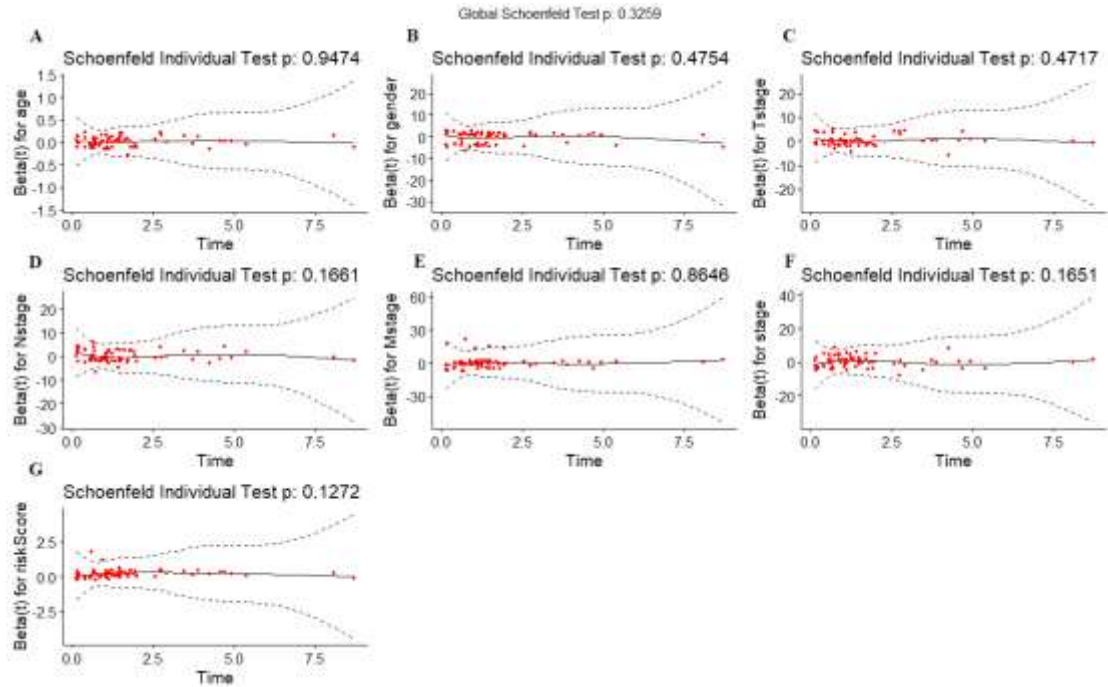

**Figure S1: Correlation of each covariate generating standardized Schoenfeld residuals relative to time. (A) age, (B) gender, (C) T-stage, (D) N-stage, (E) M-stage, (F) stage, (G) risk score.**

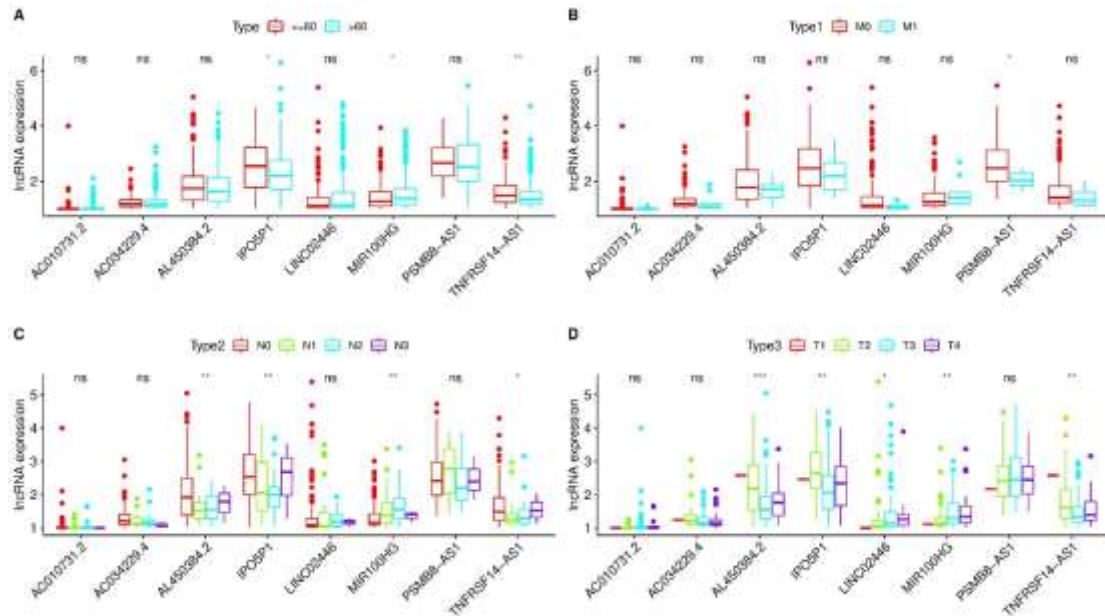

**Figure S2:** Expression of 8 pyroptosis-related lncRNAs and their clinical characteristics. (A) gender, (B) M-stage, (C) N-stage, (D) T-stage.

**Table S1.** Univariate analysis of the pyroptosis-related lncRNAs cohort

| lncRNA     | HR       | HR.95L   | HR.95H   | pvalue   |
|------------|----------|----------|----------|----------|
| ZNF460-AS1 | 0.363784 | 0.186894 | 0.708096 | 0.002923 |
| AC008760.1 | 0.55144  | 0.375899 | 0.808958 | 0.002332 |
| AC002128.1 | 0.437272 | 0.238882 | 0.800426 | 0.007326 |
| AC104825.1 | 0.613692 | 0.473013 | 0.796211 | 0.000237 |
| AC009065.8 | 0.441701 | 0.279361 | 0.698379 | 0.000473 |
| AC006042.1 | 0.735753 | 0.593684 | 0.91182  | 0.005059 |
| AL157402.2 | 1.91486  | 1.285488 | 2.852372 | 0.001398 |
| AC008764.6 | 0.358454 | 0.172082 | 0.746674 | 0.00614  |
| AC018809.1 | 0.397489 | 0.228904 | 0.690233 | 0.001051 |
| AL109811.3 | 0.65926  | 0.486379 | 0.893592 | 0.007253 |
| AC104532.2 | 0.435053 | 0.247589 | 0.764455 | 0.003805 |
| AC006942.1 | 0.490517 | 0.286279 | 0.840462 | 0.009526 |
| LUCAT1     | 1.952342 | 1.34502  | 2.83389  | 0.000433 |
| SH3BP5-AS1 | 0.516136 | 0.358874 | 0.742312 | 0.000361 |
| AL121895.2 | 0.581616 | 0.390994 | 0.86517  | 0.007478 |
| RPARP-AS1  | 0.517924 | 0.345613 | 0.776145 | 0.001433 |
| AL031651.2 | 2.611781 | 1.541846 | 4.424179 | 0.000357 |
| AC009120.2 | 0.449654 | 0.287841 | 0.70243  | 0.000445 |
| ZNF213-AS1 | 0.570726 | 0.388196 | 0.839082 | 0.004342 |
| AC005387.1 | 0.380801 | 0.212257 | 0.683179 | 0.001205 |
| AL355472.1 | 0.65006  | 0.47357  | 0.892324 | 0.007702 |
| AL139123.1 | 0.386823 | 0.195842 | 0.764044 | 0.006239 |
| AL031714.1 | 0.481427 | 0.283341 | 0.817994 | 0.006877 |
| RAD51-AS1  | 0.643774 | 0.463726 | 0.893728 | 0.008508 |
| PTPRJ-AS1  | 1.939509 | 1.253545 | 3.000848 | 0.002932 |
| AC004148.2 | 0.554619 | 0.403452 | 0.762424 | 0.000283 |
| LYST-AS1   | 2.302676 | 1.225525 | 4.326565 | 0.009543 |
| AL355488.1 | 0.63764  | 0.459337 | 0.885155 | 0.007168 |
| PTOV1-AS2  | 0.562532 | 0.423576 | 0.747074 | 7.06E-05 |
| PSMA3-AS1  | 0.554611 | 0.380273 | 0.808875 | 0.002202 |
| SAMD12-AS1 | 0.39816  | 0.209855 | 0.755431 | 0.004828 |
| AC009065.4 | 0.497734 | 0.314757 | 0.78708  | 0.002845 |
| LINC01089  | 0.662408 | 0.504048 | 0.87052  | 0.00313  |
| AC099343.2 | 0.401022 | 0.215347 | 0.746787 | 0.003972 |
| IPO5P1     | 0.662639 | 0.547056 | 0.802643 | 2.58E-05 |
| AC021321.1 | 0.193433 | 0.083245 | 0.449475 | 0.000134 |
| AC010618.2 | 0.386414 | 0.194249 | 0.768683 | 0.006735 |
| AC034229.4 | 0.273448 | 0.129061 | 0.57937  | 0.000712 |
| LINC00115  | 0.361574 | 0.175707 | 0.744057 | 0.005729 |
| AC011468.1 | 0.499466 | 0.353323 | 0.706059 | 8.47E-05 |
| AL133410.1 | 0.355502 | 0.205947 | 0.61366  | 0.000205 |
| ZKSCAN2-DT | 0.481976 | 0.282013 | 0.823723 | 0.007605 |

|                               |          |          |          |          |
|-------------------------------|----------|----------|----------|----------|
| AC005785.1                    | 0.405465 | 0.221532 | 0.742112 | 0.003422 |
| AL513477.2                    | 0.410105 | 0.222627 | 0.755463 | 0.004241 |
| AL596223.1                    | 1.742638 | 1.191072 | 2.549627 | 0.004229 |
| TMEM51-AS1                    | 0.555595 | 0.392925 | 0.785612 | 0.000884 |
| ZNF32-AS2                     | 0.468806 | 0.277145 | 0.79301  | 0.004732 |
| AL645940.1                    | 0.426043 | 0.228083 | 0.795818 | 0.007443 |
| AC005840.4                    | 0.422997 | 0.269215 | 0.664623 | 0.00019  |
| SNHG20                        | 0.532355 | 0.356514 | 0.794924 | 0.002057 |
| AC010326.3                    | 0.635449 | 0.483383 | 0.835354 | 0.001158 |
| AL162258.2                    | 0.360162 | 0.188943 | 0.686537 | 0.001918 |
| LINC01871                     | 0.803151 | 0.6814   | 0.946656 | 0.008961 |
| ETV5-AS1                      | 2.167217 | 1.266142 | 3.709559 | 0.004795 |
| AC131210.1                    | 2.166911 | 1.203887 | 3.900286 | 0.009916 |
| AC073335.2                    | 0.610162 | 0.466837 | 0.797491 | 0.000299 |
| LINC01355                     | 0.610979 | 0.422849 | 0.88281  | 0.008697 |
| STAG3L5P-PVRIG2P-PILRB        | 0.255515 | 0.13433  | 0.486029 | 3.19E-05 |
| AC063948.1                    | 0.508729 | 0.308392 | 0.83921  | 0.008136 |
| ARHGAP27P1-BPTFP1-KPNA2P<br>3 | 0.634395 | 0.468182 | 0.859616 | 0.003327 |
| RBMS3-AS3                     | 2.316836 | 1.518084 | 3.535856 | 9.81E-05 |
| AL353622.1                    | 0.445416 | 0.287652 | 0.689707 | 0.000289 |
| AC011477.3                    | 0.672853 | 0.513386 | 0.881855 | 0.004092 |
| AC003102.1                    | 0.6702   | 0.499335 | 0.899531 | 0.007696 |
| AL022328.2                    | 0.555717 | 0.383928 | 0.804373 | 0.001847 |
| AC022306.2                    | 0.461552 | 0.267042 | 0.797742 | 0.005617 |
| AC089983.1                    | 1.905992 | 1.198623 | 3.030814 | 0.00642  |
| TGFB2-AS1                     | 1.65711  | 1.131102 | 2.427731 | 0.009535 |
| AL591895.1                    | 0.744675 | 0.622041 | 0.891485 | 0.001322 |
| AL022322.1                    | 0.559295 | 0.406384 | 0.769741 | 0.000363 |
| LINC02446                     | 0.706336 | 0.557567 | 0.8948   | 0.003963 |
| AC093726.2                    | 0.40518  | 0.206782 | 0.79393  | 0.00848  |
| AC034236.2                    | 0.34261  | 0.189799 | 0.61845  | 0.000379 |
| U47924.1                      | 0.358431 | 0.174581 | 0.735891 | 0.005181 |
| AL390728.6                    | 0.591615 | 0.467909 | 0.748027 | 1.16E-05 |
| USP30-AS1                     | 0.700927 | 0.553726 | 0.88726  | 0.003132 |
| AL035563.1                    | 0.453435 | 0.25572  | 0.804015 | 0.006801 |
| AC234772.2                    | 1.605536 | 1.142722 | 2.255795 | 0.006354 |
| AC068620.2                    | 0.373497 | 0.181085 | 0.770355 | 0.007669 |
| AC104971.2                    | 2.310204 | 1.266398 | 4.214352 | 0.006334 |
| AC093788.1                    | 0.405874 | 0.236773 | 0.695745 | 0.001041 |
| AC135050.3                    | 0.389924 | 0.206042 | 0.737911 | 0.003806 |
| AC010201.2                    | 0.380137 | 0.182416 | 0.792167 | 0.009826 |
| AC105177.1                    | 2.520811 | 1.534613 | 4.140776 | 0.000261 |
| AC120053.1                    | 0.545002 | 0.391278 | 0.759122 | 0.000331 |

|              |          |          |          |          |
|--------------|----------|----------|----------|----------|
| AC010542.5   | 0.551084 | 0.399441 | 0.760296 | 0.000285 |
| AC025171.4   | 0.456601 | 0.255569 | 0.815767 | 0.008104 |
| AC243830.2   | 0.416478 | 0.21736  | 0.798001 | 0.008289 |
| AC087741.1   | 0.507989 | 0.349847 | 0.737617 | 0.000372 |
| AC010731.2   | 2.733902 | 1.767253 | 4.229285 | 6.24E-06 |
| MIR100HG     | 1.366534 | 1.084273 | 1.722275 | 0.00816  |
| AC078880.5   | 0.324983 | 0.151189 | 0.698556 | 0.003992 |
| AC084871.1   | 1.929952 | 1.227348 | 3.034765 | 0.004413 |
| AC020663.2   | 0.441619 | 0.240812 | 0.809872 | 0.008253 |
| AC016737.1   | 0.342604 | 0.16454  | 0.713368 | 0.004202 |
| AF178030.1   | 2.018385 | 1.186306 | 3.434086 | 0.009597 |
| AL355102.1   | 1.871683 | 1.230276 | 2.84749  | 0.003412 |
| SNHG16       | 1.572311 | 1.11788  | 2.211474 | 0.009316 |
| AL139089.1   | 0.44871  | 0.278078 | 0.724044 | 0.001028 |
| TNFRSF14-AS1 | 0.374913 | 0.243482 | 0.57729  | 8.40E-06 |
| AL136295.2   | 0.230709 | 0.108925 | 0.488655 | 0.000128 |
| AC005726.3   | 0.623718 | 0.46575  | 0.835263 | 0.001535 |
| AC027020.2   | 0.371091 | 0.217408 | 0.63341  | 0.000279 |
| AC115989.1   | 1.882924 | 1.179253 | 3.006481 | 0.008036 |
| AC104051.2   | 1.947026 | 1.266024 | 2.994343 | 0.002413 |
| AC007038.2   | 0.538299 | 0.343342 | 0.843958 | 0.006947 |
| AL354919.2   | 0.6465   | 0.512065 | 0.816229 | 0.000245 |
| AL450384.2   | 0.53688  | 0.403538 | 0.714282 | 1.96E-05 |
| AC078880.3   | 0.545008 | 0.371788 | 0.798931 | 0.001869 |
| PSMB8-AS1    | 0.764962 | 0.631948 | 0.925973 | 0.005976 |
| AC245884.8   | 0.52928  | 0.336685 | 0.832045 | 0.00584  |
| AL021707.6   | 0.603261 | 0.464769 | 0.783021 | 0.000146 |
| AL390719.2   | 0.790673 | 0.68751  | 0.909315 | 0.000992 |
| AC055822.1   | 0.544219 | 0.377798 | 0.78395  | 0.001087 |
| AC024060.1   | 0.569668 | 0.443987 | 0.730926 | 9.66E-06 |
| AC008610.1   | 0.562016 | 0.402892 | 0.783987 | 0.000691 |
| AC011477.2   | 0.653545 | 0.482586 | 0.885067 | 0.005977 |
| ZNF32-AS1    | 0.431919 | 0.238102 | 0.783507 | 0.005729 |
| AL355353.1   | 0.691152 | 0.575104 | 0.830616 | 8.19E-05 |

---

Table S2. LASSO regression coefficients of sixteen pyroptosis-related lncRNAs.

| lncRNA                 | Coefficient |
|------------------------|-------------|
| AL031651.2             | 0.144994    |
| IPO5P1                 | -0.18597    |
| AC021321.1             | -0.43346    |
| AC034229.4             | -0.37206    |
| AC011468.1             | -0.28031    |
| STAG3L5P-PVRIG2P-PILRB | -0.39037    |
| RBMS3-AS3              | 0.259661    |
| LINC02446              | -0.44938    |
| USP30-AS1              | -0.17052    |
| AC010731.2             | 1.395285    |
| MIR100HG               | 0.064872    |
| TNFRSF14-AS1           | -0.51875    |
| AL354919.2             | -0.12758    |
| AL450384.2             | -0.28801    |
| PSMB8-AS1              | -0.0486     |
| AL355353.1             | -0.01124    |

Table S3: Proportional Hazards Assumption of nomogram Cox Regression

|            | chisq   | df | P    |
|------------|---------|----|------|
| age        | 0.00436 | 1  | 0.95 |
| Gender     | 0.50937 | 1  | 0.48 |
| T stage    | 0.51808 | 1  | 0.47 |
| N stage    | 1.91813 | 1  | 0.17 |
| M stage    | 0.02906 | 1  | 0.86 |
| Stage      | 1.92675 | 1  | 0.17 |
| Risk score | 2.32676 | 1  | 0.13 |
| GLOBAL     | 8.07666 | 7  | 0.33 |

Table S4. Gene set enrichment GO analysis results of high risk group 8 pyroptosis-related lncRNAs (Top 10 p-value)

| NAME                                    | SIZE | NES      | NOM p-val | FDR q-val | LEADING EDGE                   |
|-----------------------------------------|------|----------|-----------|-----------|--------------------------------|
| GOMF_PROTEIN_TRANSPORTER_ACTIVITY       | 29   | 1.73256  | 0.001908  | 1         | tags=48%, list=12%, signal=55% |
| GOMF_OLIGOSACCHARIDE_BINDING            | 16   | 1.705475 | 0.00202   | 0.991089  | tags=63%, list=11%, signal=70% |
| GOMF_MONOSACCHARIDE_BINDING             | 67   | 1.734055 | 0         | 1         | tags=54%, list=13%, signal=62% |
| GOMF_MANNOSE_BINDING                    | 19   | 1.771577 | 0         | 1         | tags=68%, list=16%, signal=81% |
| GOMF_DISULFIDE_OXIDOREDUCTASE_ACTIVITY  | 40   | 1.756601 | 0         | 1         | tags=70%, list=16%, signal=84% |
| GOMF_2_IRON_2_SULFUR_CLUSTER_BINDING    | 22   | 1.729062 | 0.005758  | 0.91257   | tags=50%, list=10%, signal=55% |
| GOCC_AZUROPHIL_GRANULE_LUMEN            | 91   | 1.740597 | 0.004107  | 1         | tags=63%, list=17%, signal=76% |
| GOCC_AZUROPHIL_GRANULE                  | 153  | 1.685629 | 0.012474  | 1         | tags=55%, list=15%, signal=65% |
| GOBP_PEPTIDYL_PROLINE_MODIFICATION      | 58   | 1.69061  | 0.004024  | 1         | tags=45%, list=14%, signal=52% |
| GOBP_CHAPERONE_MEDIATED_PROTEIN_FOLDING | 63   | 1.7086   | 0         | 1         | tags=48%, list=11%, signal=54% |



Table S5. Top 10 function of 8 pyroptosis-related lncRNAs from GO enrichment analysis results of low-risk group (Top 10 p-value)

| NAME                                                        | SIZ<br>E | NES      | NOM<br>p-val | FDR<br>q-val | LEADING EDGE                      |
|-------------------------------------------------------------|----------|----------|--------------|--------------|-----------------------------------|
| GOMF_LIGAND_ACTIVATED_TRANSCRIPTION_FACTOR_ACTIVITY         | 52       | -1.77725 | 0            | 0.93056      | tags=52%, list=14%,<br>signal=61% |
| GOBP_ORGANISM_EMERGENCE_FROM_PROTECTIVE_STRUCTURE           | 22       | -1.7729  | 0            | 0.50638<br>7 | tags=59%, list=16%,<br>signal=70% |
| GOBP_NEGATIVE_REGULATION_OF_CHOLESTEROL_EFFLUX              | 15       | -1.69327 | 0.005952     | 1            | tags=53%, list=16%,<br>signal=63% |
| GOBP_PHOSPHATIDYLCHOLINE_ACYL_CHAIN_REMODELING              | 29       | -1.65638 | 0            | 1            | tags=45%, list=10%,<br>signal=50% |
| GOBP_BRANCHING_INVOLVED_IN_MAMMARY_GLAND_DUCT_MORPHOGENESIS | 20       | -1.63565 | 0.008065     | 1            | tags=65%, list=18%,<br>signal=79% |
| GOBP_RETINOIC_ACID_RECEPTOR_SIGNALING_PATHWAY               | 32       | -1.60752 | 0.005859     | 1            | tags=50%, list=17%,<br>signal=60% |
| GOBP_NEGATIVE_REGULATION_OF_STEROL_TRANSPORT                | 23       | -1.60312 | 0.021526     | 1            | tags=52%, list=16%,<br>signal=62% |
| GOBP_DIACYLGLYCEROL_METABOLIC_PROCESS                       | 25       | -1.6001  | 0.006036     | 1            | tags=48%, list=14%,<br>signal=56% |
| GOBP_HISTONE_H3_K4_TRIMETHYLATION                           | 17       | -1.59473 | 0.009728     | 1            | tags=76%, list=16%,<br>signal=90% |
| GOBP_PHOSPHATIDYLETHANOLAMINE_ACYL_CHAIN_REMODELING         | 23       | -1.58862 | 0.014199     | 1            | tags=43%, list=10%,<br>signal=48% |

Table S6. KEGG pathway analysis results 8 pyroptosis-related lncRNAs in high-risk group (Top 10 p-value).

| NAME                                                    | SIZE | NES       | NOM.pvalue  | FDR        | LEADING EDGE                   |
|---------------------------------------------------------|------|-----------|-------------|------------|--------------------------------|
| KEGG_PROTEASOME                                         | 46   | 1.6171805 | 0.028056113 | 0.8888676  | tags=76%, list=13%, signal=88% |
| KEGG_PRION_DISEASES                                     | 35   | 1.6146219 | 0.011976048 | 0.45655707 | tags=54%, list=16%, signal=65% |
| KEGG_GLYCOSAMINOGLYCAN_BIOSYNTHESIS_CHONDROITIN_SULFATE | 22   | 1.5632548 | 0.029239766 | 0.5445688  | tags=64%, list=16%, signal=75% |
| KEGG_PURINE_METABOLISM                                  | 156  | 1.5081213 | 0.022633744 | 0.7085648  | tags=55%, list=24%, signal=72% |
| KEGG_AMINO_SUGAR_AND_NUCLEOTIDE_SUGAR_METABOLISM        | 42   | 1.5065918 | 0.036144577 | 0.5736164  | tags=50%, list=16%, signal=59% |
| KEGG_RENIN_ANGIOTENSIN_SYSTEM                           | 17   | 1.4977536 | 0.03426124  | 0.5124177  | tags=59%, list=15%, signal=69% |
| KEGG_PROTEIN_EXPORT                                     | 24   | 1.4931266 | 0.042944785 | 0.45845512 | tags=54%, list=17%, signal=65% |
| KEGG_CYTOKINE_CYTOKINE_RECEPTOR_INTERACTION             | 264  | 1.476344  | 0.049603175 | 0.4640261  | tags=45%, list=15%, signal=53% |
| KEGG_AUTOIMMUNE_THYROID_DISEASE                         | 50   | 1.4361321 | 0.114173226 | 0.57255715 | tags=40%, list=10%, signal=45% |
| KEGG_SYSTEMIC_LUPUS_ERYTHEMATOSUS                       | 55   | 1.4357249 | 0.09325397  | 0.51699173 | tags=65%, list=18%, signal=80% |

Table S7. KEGG pathway analysis results 8 pyroptosis-related lncRNAs in low-risk group (Top 10 p-value).

| NAME                                              | SIZE | NES      | NOM.pvalue | FDR      | LEADING EDGE                   |
|---------------------------------------------------|------|----------|------------|----------|--------------------------------|
| KEGG_LINOLEIC_ACID_METABOLISM                     | 29   | -1.59555 | 0.00996    | 0.558545 | tags=48%, list=13%, signal=55% |
| KEGG_ALPHA_LINOLENIC_ACID_METABOLISM              | 19   | -1.43757 | 0.053254   | 1        | tags=53%, list=12%, signal=60% |
| KEGG_PRIMARY_BILE_ACID_BIOSYNTHESIS               | 16   | -1.3933  | 0.079612   | 1        | tags=38%, list=5%, signal=40%  |
| KEGG_DRUG_METABOLISM_CYTOCHROME_P450              | 71   | -1.36543 | 0.054264   | 1        | tags=41%, list=15%, signal=48% |
| KEGG_METABOLISM_OF_XENOBIOTICS_BY_CYTOCHROME_P450 | 69   | -1.34506 | 0.068762   | 0.90958  | tags=41%, list=15%, signal=48% |
| KEGG_GLYCEROPHOSPHOLIPID_METABOLISM               | 77   | -1.34308 | 0.035573   | 0.767071 | tags=34%, list=15%, signal=40% |
| KEGG_RETINOL_METABOLISM                           | 64   | -1.32524 | 0.048544   | 0.732856 | tags=38%, list=13%, signal=43% |
| KEGG_NOTCH_SIGNALING_PATHWAY                      | 47   | -1.32319 | 0.084314   | 0.649976 | tags=64%, list=25%, signal=85% |
| KEGG_ADIPOCYTOKINE_SIGNALING_PATHWAY              | 67   | -1.27198 | 0.109756   | 0.783415 | tags=46%, list=18%, signal=56% |
| KEGG_DORSO_VENTRAL_AXIS_FORMATION                 | 24   | -1.21072 | 0.184      | 0.966428 | tags=42%, list=14%, signal=48% |
